# Supplementary material for: Nutritional interventions for adolescents using information and communication technologies (ICTs): A systematic review
Source: PubMed Central journal article supplement (PMC5621667; doi:10.1371/journal.pone.0184509), 2017-09-29
Supplement: pone.0184509.s003.pdf [file pone.0184509.s003.pdf]

## PROSPERO International prospective register of systematic reviews

### Review title and timescale

#### 1 Review title

Give the working title of the review. This must be in English. Ideally it should state succinctly the interventions or exposures being reviewed and the associated health or social problem being addressed in the review.

**Nutritional interventions for adolescents using information and communication technologies (ICT): a systematic review**

#### 2 Original language title

For reviews in languages other than English, this field should be used to enter the title in the language of the review. This will be displayed together with the English language title.

#### 3 Anticipated or actual start date

Give the date when the systematic review commenced, or is expected to commence.

**01/12/2015**

#### 4 Anticipated completion date

Give the date by which the review is expected to be completed.

**01/04/2016**

#### 5 Stage of review at time of this submission

Indicate the stage of progress of the review by ticking the relevant boxes. Reviews that have progressed beyond the point of completing data extraction at the time of initial registration are not eligible for inclusion in PROSPERO. This field should be updated when any amendments are made to a published record.

The review has not yet started

| Review stage                                                    | Started | Completed |
|-----------------------------------------------------------------|---------|-----------|
| Preliminary searches                                            | No      | Yes       |
| Piloting of the study selection process                         | No      | Yes       |
| Formal screening of search results against eligibility criteria | No      | Yes       |
| Data extraction                                                 | No      | No        |
| Risk of bias (quality) assessment                               | Yes     | No        |
| Data analysis                                                   | No      | No        |

Provide any other relevant information about the stage of the review here.

### Review team details

#### 6 Named contact

The named contact acts as the guarantor for the accuracy of the information presented in the register record.

**Giselle Rhaisa do Amaral e Melo**

#### 7 Named contact email

Enter the electronic mail address of the named contact.

**giselle-melo1502@hotmail.com**

#### 8 Named contact address

Enter the full postal address for the named contact.

**Natacha Toral Secretaria de Nutrição, Faculdade da Saúde Campus Universitário Darcy Ribeiro, Universidade de Brasília  
 Asa Norte, Brasília- DF, Brazil Cep: 70910-900**

#### 9 Named contact phone number

Enter the telephone number for the named contact, including international dialing code.

#### 10 Organisational affiliation of the review

Full title of the organisational affiliations for this review, and website address if available. This field may be completed as 'None' if the review is not affiliated to any organisation.

**Universidade de Brasília**

Website address:

**http://fs.unb.br**

#### 11 Review team members and their organisational affiliations

Give the title, first name and last name of all members of the team working directly on the review. Give the organisational affiliations of each member of the review team.

| Title | First name     | Last name                | Affiliation              |
|-------|----------------|--------------------------|--------------------------|
| Miss  | Giselle Rhaisa | do Amaral e Melo         | Universidade de Brasília |
| Miss  | Fernanda       | de Carvalho Silva Vargas | Universidade de Brasília |

|          |                           |                                                |                                                      |
|----------|---------------------------|------------------------------------------------|------------------------------------------------------|
| Dr<br>Ms | Maria Natacha<br>Carolina | Torai Bertolin<br>Martins dos Santos<br>Chagas | Universidade de Brasília<br>Universidade de Brasília |
|----------|---------------------------|------------------------------------------------|------------------------------------------------------|

**12 Funding sources/sponsors**

Give details of the individuals, organizations, groups or other legal entities who take responsibility for initiating, managing, sponsoring and/or financing the review. Any unique identification numbers assigned to the review by the individuals or bodies listed should be included.

none

**13 Conflicts of interest**

List any conditions that could lead to actual or perceived undue influence on judgements concerning the main topic investigated in the review.

Are there any actual or potential conflicts of interest?

None known

**14 Collaborators**

Give the name, affiliation and role of any individuals or organisations who are working on the review but who are not listed as review team members.

| Title | First name | Last name | Organisation details |
|-------|------------|-----------|----------------------|
|-------|------------|-----------|----------------------|

**Review methods****15 Review question(s)**

State the question(s) to be addressed / review objectives. Please complete a separate box for each question.

What type of nutritional education interventions using digital technology are being applied for adolescents ?  
what are their impact on nutrition behavior?

**16 Searches**

Give details of the sources to be searched, and any restrictions (e.g. language or publication period). The full search strategy is not required, but may be supplied as a link or attachment.

Electronic searches up to January 2016 will be conducted using the following electronic bibliographic databases: Medline/PubMed, Scopus, Web of Science, PsycINFO, and SciELO.ORG. The initial search strategy will be designed for PubMed/Medline and adapted to other databases. After the study selection, we will search the reference list of included articles. It will be included studies that were written in Portuguese, English or Spanish and published between January 2005 and January 2016. Only full papers, original articles, are going to be included.

**17 URL to search strategy**

If you have one, give the link to your search strategy here. Alternatively you can e-mail this to PROSPERO and we will store and link to it.

**18 Condition or domain being studied**

Give a short description of the disease, condition or healthcare domain being studied. This could include health and wellbeing outcomes.

Nutrition. Healthy eating habits in adolescents.

**19 Participants/population**

Give summary criteria for the participants or populations being studied by the review. The preferred format includes details of both inclusion and exclusion criteria.

Healthy adolescents (10 to 19 years old). We will also include those studies which mainly focused on adolescents, but included children above 8 yo or young adults. Overweight will not be considered as a disease.

**20 Intervention(s), exposure(s)**

Give full and clear descriptions of the nature of the interventions or the exposures to be reviewed

We will include studies that promote valuable information about nutritional education interventions or programs related to any field of nutrition that used ICT in adolescents.

**21 Comparator(s)/control**

Where relevant, give details of the alternatives against which the main subject/topic of the review will be compared (e.g. another intervention or a non-exposed control group).

None or traditional nutrition education OR different technologies

**22 Types of study to be included initially**

Give details of the study designs to be included in the review. If there are no restrictions on the types of study design eligible for inclusion, this should be stated.

Randomized controlled trials, quasi-experimental, and observational studies will be considered

**23 Context**

Give summary details of the setting and other relevant characteristics which help define the inclusion or exclusion criteria.

**24 Primary outcome(s)**

Give the most important outcomes.

What are the main characteristics of the intervention (materials, frequency of exposure, variables measured, settings, etc)?

Give information on timing and effect measures, as appropriate.

**25 Secondary outcomes**

List any additional outcomes that will be addressed. If there are no secondary outcomes enter None.

**Effectiveness of the interventions.**

Give information on timing and effect measures, as appropriate.

**26 Data extraction, (selection and coding)**

Give the procedure for selecting studies for the review and extracting data, including the number of researchers involved and how discrepancies will be resolved. List the data to be extracted.

In phase 1, two reviewers(1R and 2R) will review independently the list of titles and abstracts according to the inclusion criteria. The full articles selected for phase 2 will be read independently by two reviewers (1R and 2R) to decide whether they meet the inclusion criteria. If there is disagreement in screening and eligibility phases, the expert (E) will be contacted to make the decision. Data will be extracted independently by two reviewers (1R and 2R) on the following characteristics: quality of the study, author and year of publication, sample, age of the sample, type of technology, description of the education intervention, length of the intervention, outcomes and conclusions. Disagreements will be resolved by the expert . Others papers can be added in the review via reference lists from original papers. Articles will be organized via the program Mendeley.

**27 Risk of bias (quality) assessment**

State whether and how risk of bias will be assessed, how the quality of individual studies will be assessed, and whether and how this will influence the planned synthesis.

Two reviewers (1R and 2R) will perform the quality assessment of the included studies. Disagreements will be revised by discussion, and the expert (E) will adjudicate unresolved discrepancies. The quality of the studies will be described in table and the Effective Public Health Practice Project (EPHPP) Quality Assessment Tool will be used.

**28 Strategy for data synthesis**

Give the planned general approach to be used, for example whether the data to be used will be aggregate or at the level of individual participants, and whether a quantitative or narrative (descriptive) synthesis is planned. Where appropriate a brief outline of analytic approach should be given.

The characteristics of interest of the studies will be described in table as informed in "Data collection process". The interventions will be described in a narrative way. Data will be used aggregated.

**29 Analysis of subgroups or subsets**

Give any planned exploration of subgroups or subsets within the review. 'None planned' is a valid response if no subgroup analyses are planned.

none planned.

**Review general information****30 Type of review**

Select the type of review from the drop down list.

Intervention

**31 Language**

Select the language(s) in which the review is being written and will be made available, from the drop down list. Use the control key to select more than one language.

English

Will a summary/abstract be made available in English?

Yes

**32 Country**

Select the country in which the review is being carried out from the drop down list. For multi-national collaborations select all the countries involved. Use the control key to select more than one country.

Brazil

**33 Other registration details**

Give the name of any organisation where the systematic review title or protocol is registered together with any unique identification number assigned. If extracted data will be stored and made available through a repository such as the Systematic Review Data Repository (SRDR), details and a link should be included here.

**34 Reference and/or URL for published protocol**

Give the citation for the published protocol, if there is one.

Give the link to the published protocol, if there is one. This may be to an external site or to a protocol deposited with CRD in pdf format.

**35 Dissemination plans**

Give brief details of plans for communicating essential messages from the review to the appropriate audiences.

Do you intend to publish the review on completion?

Yes

**36 Keywords**

Give words or phrases that best describe the review. (One word per box, create a new box for each term)

eHealth

Adolescent  
Health Education,  
Nutrition

**37 Details of any existing review of the same topic by the same authors**

Give details of earlier versions of the systematic review if an update of an existing review is being registered, including full bibliographic reference if possible.

**38 Current review status**

Review status should be updated when the review is completed and when it is published.

Ongoing

**39 Any additional information**

Provide any further information the review team consider relevant to the registration of the review.

This review is being undertaken as a preliminary step for the development of an eHealth intervention for brazilian adolescents.

**40 Details of final report/publication(s)**

This field should be left empty until details of the completed review are available.

Give the full citation for the final report or publication of the systematic review.

Give the URL where available.
