# Supplementary material for: Nutritional interventions for adolescents using information and communication technologies (ICTs): A systematic review
Source: PLoS One. 2017 Sep 29;12(9):e0184509. doi: 10.1371/journal.pone.0184509 (PMC5621667; doi:10.1371/journal.pone.0184509)
Supplement: S1 Table — (XLSX) [file pone.0184509.s001.xlsx]

## Sheet: Plan1
Resultado Questionário
Artigo	AQ1	AQ2	Resultado	B1	B2	B3	B4	Resultado	CQ1.1	CQ1.2	Resultado	DQ1	DQ2	Resultado	EQ1	EQ2	Resultado	FQ1	FQ2	Resultado	GQ1	GQ2	GQ3	Resultado	HQ1	HQ2	HQ3	HQ4	Resultado	Resultado final
Consumer Understanding of Calorie Labeling: A Healthy Monday E-Mail and Text Message Intervention	3	5	3	1	Yes	No	0	1	2	0	1	1	2	2	2	1	3	1	2	2	2	2	5		Institution	Individual	1	2		3
Efficacy and acceptability of an Internet platform to improve the learning of nutritional knowledge in children: the ETIOBE mates	3	1	3	2	No	No	0	1	2	0	1	1	2	2	2	1	3	1	4	3	3	1	5		Institution	Individual	1	3		3
Comparison of a Web-based versus traditional diet recall among children.	2	5	2	1	Yes	No	0	1	2	0	1	3	3	2	2	1	3	4	5	3?	2 (Moderate)
Promoting healthy eating to children: a text message (SMS) feedback approach
Differential effects of the computer-tailored FATaintPHAT programme on dietary behaviours according to sociodemographic, cognitive and home environmental factors	2	5	2	1	Yes	Yes	Yes	1	1	1	2	3	3	2	1	1	1	1	1	1										1
A computer-tailored dietary fat intake intervention for adolescents: Results of a randomized controlled trial	1	1	1	1	Yes	Yes	Yes	1	2	0	1	3	3	2	1	1	1	1	1	1										1
Behavioural and weight status outcomes from an exploratory trial of the Healthy Lifestyles Programme (HeLP): a novel school-based obesity prevention programme
Preventing Obesity Among Adolescent Girls	2	5	2	1	Yes	Yes	Yes	1	2	0	1	3	3	2	1	1	1	1	3	3										2
The Feasibility of an E-mail-Delivered Intervention to Improve Nutrition and Physical Activity Behaviors in African American College Students	3	1	3	1	yes	yes	yes	1	2	0	1	2	2	1	2	1	2	1	2	2										2
Pilot evaluation of the HELENA (Healthy Lifestyle in Europe by Nutrition in Adolescence) Food-O-Meter, a computer-tailored nutrition advice for adolescents: a study in six European cities	1	5	2	1	Yes	Yes	Yes	1	1	1	1	3	3	2	1	1	1	1	2	2										1
A computerised tailored intervention for increasing intakes of fruit, vegetables, brown bread and wholegrain cereals in adolescent girls	2	1	2	1	Yes	Yes	Yes	1	1	1	1	3	3	2	2	2	3	1	1	1										2
Use of Text Messaging for Monitoring Sugar-sweetened Beverages, Physical Activity, and Screen Time in Children: A Pilot Study
Effects of the Quest to Lava Mountain Computer Game on Dietary and Physical Activity Behaviors of Elementary School Children: A Pilot Group-Randomized Controlled Trial
Boy Scout 5-a-Day Badge: Outcome results of a troop and Internet intervention
An Internet Obesity Prevention Program for Adolescents
Technology-enhanced game-based team learning for improving intake of food groups and nutritional elements
Decreasing Sugar-Sweetened Beverage Consumption in the Rural Adolescent Population	3	1	3	6	No	0	0	2	3

## Sheet: Artigos finais
Questionnaire - Result
PAPERS	AQ1	AQ2	Result	B1	B2	B3	B4	Result	CQ1.1	CQ1.2	Result	DQ1	DQ2	Result	EQ1	EQ2	Result	FQ1	FQ2	Result	Final result
Efficacy and acceptability of an Internet platform to improve the learning of nutritional knowledge in children: the ETIOBE mates	3	2	3	1	Yes	No	0	1	1	4	3	3	3	2	2	3	3	2	4	3	3 (Weak)
Differential effects of the computer-tailored FATaintPHAT programme on dietary behaviours	2	5	2	1	Yes	Yes	Yes	1	1	1	2	3	3	2	1	1	1	1	1	1	1 (Strong)
A computer-tailored dietary fat intake intervention for adolescents: Results of a randomized controlled trial	1	1	1	1	Yes	Yes	Yes	1	2	0	1	3	3	2	1	1	1	1	1	1	1 (Strong)
Preventing Obesity Among Adolescent Girls	2	5	2	1	Yes	Yes	Yes	1	2	0	1	3	3	2	1	1	1	1	3	3	2 (Moderate)
Pilot evaluation of the HELENA (Healthy Lifestyle in Europe by Nutrition in Adolescence) Food-O-Meter	1	5	2	1	Yes	Yes	Yes	1	1	1	1	3	3	2	1	1	1	1	2	2	1 (Strong)
A computerised tailored intervention for increasing intakes of fruit, vegetables, brown bread and wholegrain cereals in adolescent girls	2	1	2	1	Yes	Yes	Yes	1	1	1	1	3	3	2	2	2	3	1	1	1	2 (Moderate)
Promoting healthy eating to children: a text message (SMS) feedback approach	1	5	2	1	Yes	yes	yes	1	3	0	3	yes	yes	3	2	1	2	1	3	3	3 (Weak)
Effects of the Quest to Lava Mountain Computer Game on Dietary and Physical Activity Behaviors of Elementary School Children	2	3	3	1	Yes	Yes	Yes	1	1	2	2	3	3	2	1	1	1	1	1	1	2 (Moderate)
Boy Scout 5-a-Day Badge: Outcome results of a troop and Internet intervention	1	2	2	1	Yes	Yes	Yes	1	1	1	1	1	1	3	1	1	1	2	1	1	2 (Moderate)
An Internet Obesity Prevention Program for Adolescents	2	2	2	1	Yes	Yes	Yes	1	2	0	1	3	3	2	1	1	1	1	3	3	2 (Moderate)
Technology-enhanced game-based team learning for improving intake of food groups and nutritional elements	4	5	3	1	Yes	No	0	1	1	1	1	3	3	2	3	3	3	1	1	1	3 (Weak)
